# Supplementary material
Source: PubMed Central journal article supplement (PMC3981930)
Supplement: NIHMS555420-supplement-1.pdf [file NIHMS555420-supplement-1.pdf]

## **Data supplement**

### **Netrin-1 promotes adipose tissue macrophage accumulation and insulin resistance in obesity**

Bhama Ramkhelawon<sup>1</sup>, Elizabeth J Hennessy<sup>1</sup>, Mickaël Ménager<sup>2</sup>, Tathagat D. Ray<sup>1</sup>, Frederick J Sheedy<sup>1</sup>, Susan Hutchison<sup>1</sup>, Amarylis Wanschel<sup>1</sup>, Scott Oldebeken<sup>1</sup>, Michele Geoffrion<sup>4</sup>, Westley Spiro<sup>1</sup>, George Miller<sup>3</sup>, Ruth McPherson<sup>4</sup>, Katey J Rayner<sup>4</sup>, Kathryn J Moore<sup>1</sup>

<sup>1</sup>Department of Medicine, Marc and Ruti Bell Program for Vascular Biology and Disease, The Leon H. Charney Division of Cardiology, New York University School of Medicine, New York, NY, USA, <sup>2</sup>Molecular Pathogenesis Program, The Kimmel Center for Biology and Medicine of the Skirball Institute, New York University School of Medicine, New York, NY, USA, <sup>3</sup>Department of Surgery, New York University School of Medicine, New York, NY, USA, <sup>4</sup>University of Ottawa Heart Institute, Ottawa, Canada.

## Supplemental Figure 1

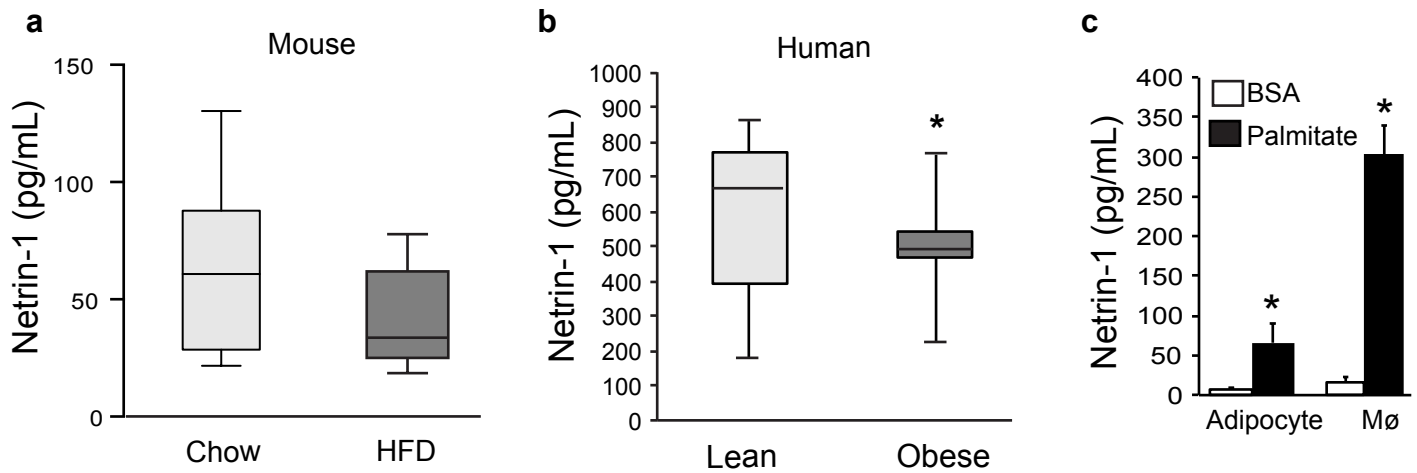

### Secreted concentrations of Netrin-1 in serum and conditioned media.

(a) Serum levels of netrin-1 in mice fed a chow diet (n=9) or HFD (n=10). (b) Serum levels of netrin-1 in obese (n=20) or lean (n=20) human subjects. (c) Concentration of netrin-1 in conditioned media of 3T3L1 adipocytes or BMDM treated with 250  $\mu$ M BSA or palmitate (n=4). Data are the mean  $\pm$  s.e.m. \*P < 0.05.

## Supplemental Figure 2

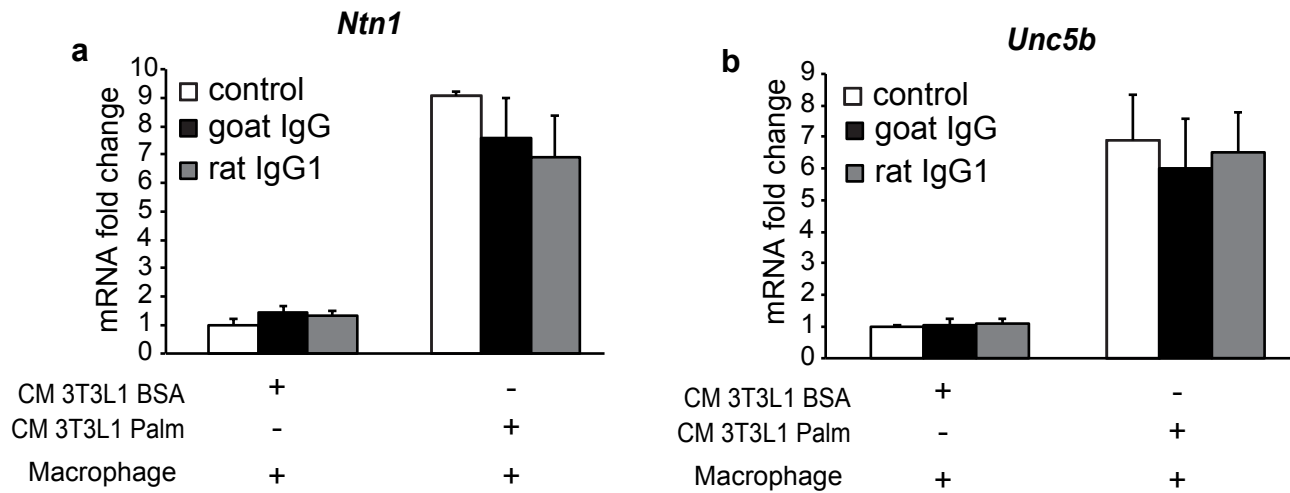

### Conditioned media of 3T3L1 adipocytes treated with palmitate induces the expression of *Ntn1* and *Unc5b*

(a-b) qRT-PCR analysis of mRNA for *Ntn1* (a) and *Unc5b* (b) in BMDMs treated with conditioned media from BSA or palmitate-treated 3T3L1 adipocytes in the presence of the corresponding IgG controls for anti-TNF $\alpha$  (goat IgG) and anti-IL-6 (rat IgG1). Data are the mean  $\pm$  s.d of triplicate samples from a single experiment.

### Supplemental Figure 3

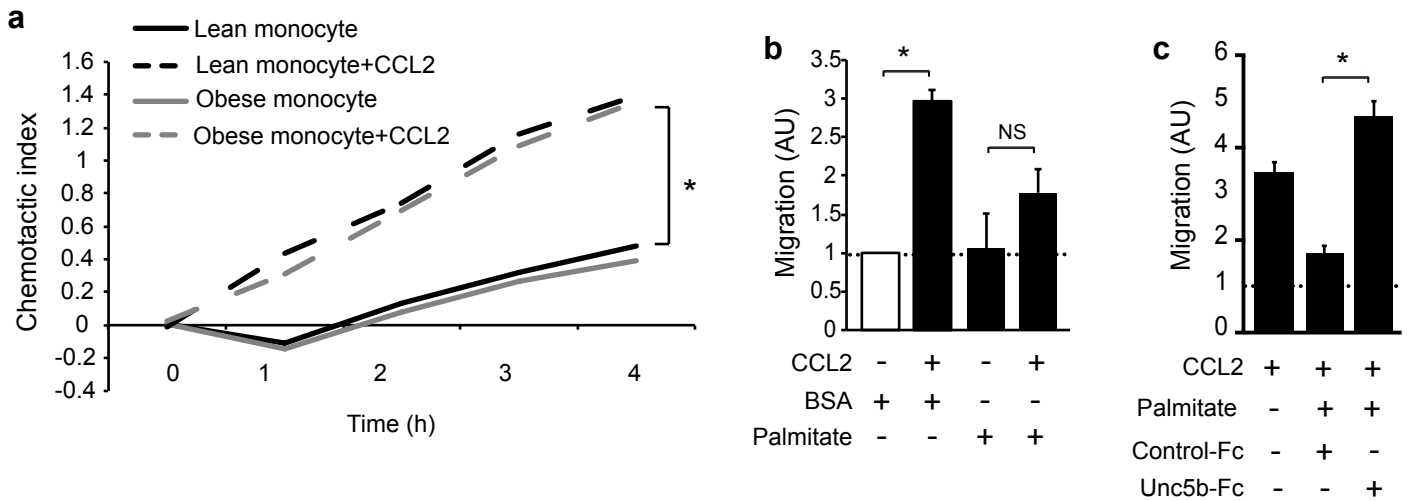

#### CCL2 promotes the migration of blood monocytes but not of palmitate-treated BMDM

(a) Migration of monocytes isolated from chow or HFD-fed mice to CCL2. (b) Migration to CCL2 of bone marrow derived macrophages pre-treated with BSA or palmitate, and (c) in the additional presence of Unc5b-FC or control-FC. Data are the mean  $\pm$  s.d of a single experiment and are representative of 2 (a) or 3 (b-c) independent experiments. \* $P < 0.05$ .

## Supplemental Figure 4

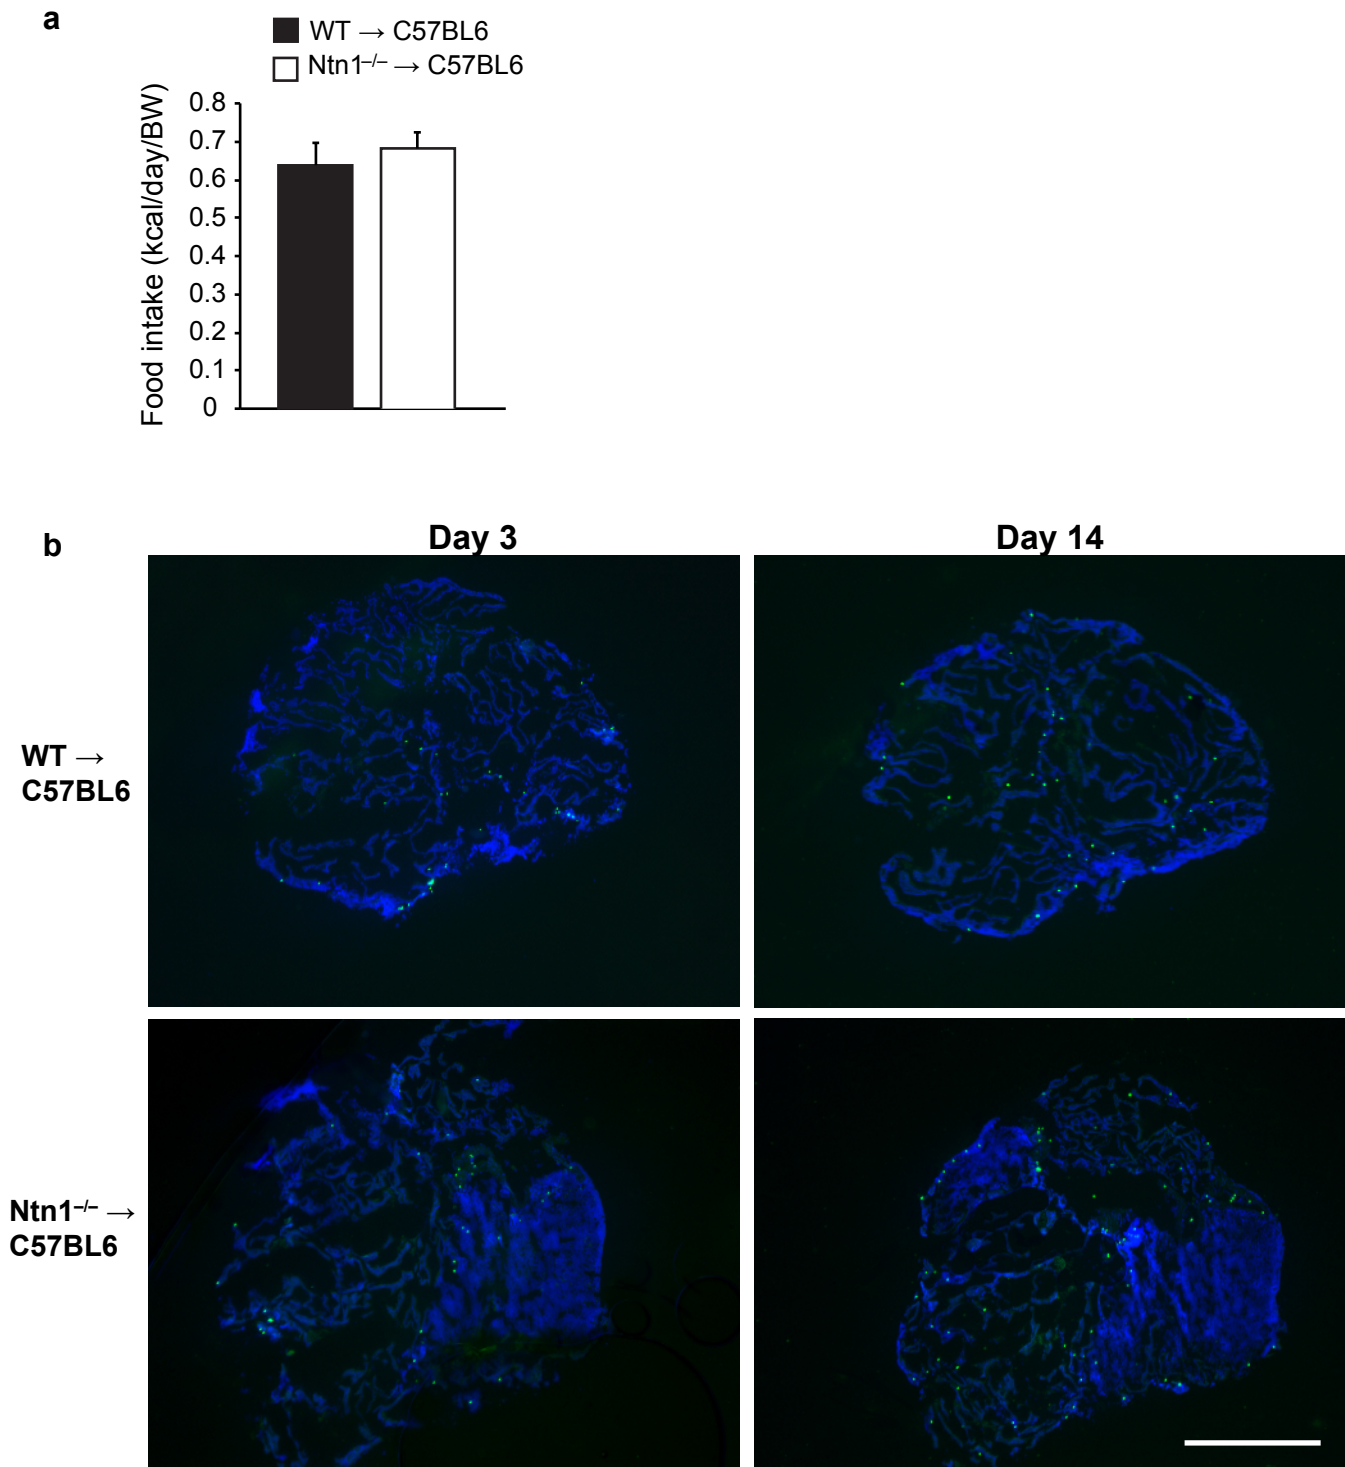

### Netrin-1 deficiency does not affect food intake but induces the migration of macrophages to the lymph nodes.

(a) Food intake in C57BL6 mice transplanted with WT (n=10) or *Ntn1*<sup>-/-</sup> (n=9) bone marrow fed HFD. Data are the mean  $\pm$  s.e.m. \*p<0.05. (b) Representative images of mesenteric lymph nodes of HFD-fed WT (n=5) and *Ntn1*<sup>-/-</sup> (n=5) mice showing fluorescent bead accumulation 3 and 14 days after monocyte labeling. Scale bar 500 $\mu$ m. Data are the mean number of beads per section (6 sections per lymph node).

**Supplementary Table 1.****Neuronal guidance cues gene expression profiling of HFD or chow WAT.**

Expression of neuronal guidance cues of the netrin, slit, semaphorin and ephrin families and their receptors in WAT of *C57BL6* mice fed chow or HFD (n=3 mice/group).

| Full Name                       | Refseq #     | Gene Symbol | Fold Regulation HFD/Chow |
|---------------------------------|--------------|-------------|--------------------------|
| Netrin 1                        | NM_008744    | Ntn1        | 2.0705                   |
| Netrin 3                        | NM_010947    | Ntn3        | -1.2834                  |
| Netrin 4                        | NM_021320    | Ntn4        | -1.5052                  |
| Netrin G1                       | NM_030699    | Ntng1       | -1.2834                  |
| Netrin G2                       | NM_133501    | Ntng2       | -2.362                   |
| Deleted in colorectal carcinoma | NM_007831    | Dcc         | -1.7532                  |
| Neogenin                        | NM_008684    | Neo1        | -2.639                   |
| Unc-5 homolog A                 | NM_153131    | Unc5a       | -1.4439                  |
| Unc-5 homolog B                 | NM_029770    | Unc5b       | 3.2944                   |
| Unc-5 homolog C                 | NM_009472    | Unc5c       | 1.5157                   |
| Unc-5 homolog D                 | NM_153135    | Unc5d       | -1.2834                  |
| Adenosine A2a receptor          | NM_009630    | Adora2a     | -6.8211                  |
| Adenosine A2b receptor          | NM_007413    | Adora2b     | 2.6027                   |
| Slit homolog 1                  | NM_015748    | Slit1       | -1.7171                  |
| Slit homolog 2                  | NM_178804    | Slit2       | 4.4383                   |
| Slit homolog 3                  | NM_011412    | Slit3       | 1.5052                   |
| Roundabout homolog 1            | NM_019413    | Robo1       | 1.3013                   |
| Roundabout homolog 2            | NM_175549    | Robo2       | -1.2834                  |
| Roundabout homolog 3            | XM_001476840 | Robo3       | -10.8528                 |
| Roundabout homolog 4            | NM_028783    | Robo4       | -9.7811                  |
| Ephrin A1                       | NM_010107    | Efna1       | -3.7064                  |
| Ephrin A2                       | NM_007909    | Efna2       | 1.1173                   |
| Ephrin A3                       | NM_010108    | Efna3       | -1.2834                  |
| Ephrin A4                       | NM_007910    | Efna4       | 2.7132                   |
| Ephrin A5                       | NM_010109    | Efna5       | -2.5847                  |
| Ephrin B1                       | NM_010110    | Efnb1       | -1.6021                  |
| Ephrin B2                       | NM_010111    | Efnb2       | -1.366                   |
| Ephrin B3                       | NM_007911    | Efnb3       | -1.257                   |
| Eph receptor A1                 | NM_023580    | Epha1       | 1.1251                   |
| Eph receptor A2                 | NM_010139    | Epha2       | -1.0497                  |
| Eph receptor A3                 | NM_010140    | Epha3       | 14.8254                  |
| Eph receptor A4                 | NM_007936    | Epha4       | -5.4264                  |
| Eph receptor A5                 | NM_007937    | Epha5       | 1.4743                   |
| Eph receptor A6                 | NM_007938    | Epha6       | -48.1679                 |
| Eph receptor A7                 | NM_010141    | Epha7       | 1.0792                   |
| Eph receptor A8                 | NM_007939    | Epha8       | -1.2834                  |
| Eph receptor A10                | NM_177671    | Epha10      | -1.2834                  |
| Eph receptor B1                 | NM_173447    | Ephb1       | -2.5669                  |
| Eph receptor B2                 | NM_010142    | Ephb2       | 2.6574                   |
| Eph receptor B3                 | NM_010143    | Ephb3       | 1.3195                   |
| Eph receptor B4                 | NM_010144    | Ephb4       | -3.0738                  |
| Eph receptor B6                 | NM_007680    | Ephb6       | -4.1699                  |

| <b>Full Name</b>                   | <b>Refseq #</b> | <b>Gene Symbol</b> | <b>Fold Regulation HFD/Chow</b> |
|------------------------------------|-----------------|--------------------|---------------------------------|
| Semaphorin 3A, secreted            | NM_009152       | Sema3a             | -1.1408                         |
| Semaphorin 3B, secreted            | NM_009153       | Sema3b             | 1.4641                          |
| Semaphorin 3C, secreted            | NM_013657       | Sema3c             | 1.1728                          |
| Semaphorin 3D, secreted            | NM_028882       | Sema3d             | -1.4044                         |
| Semaphorin 3E, secreted            | NM_011348       | Sema3e             | 1.979                           |
| Semaphorin 3F, secreted            | NM_011349       | Sema3f             | -2.2038                         |
| Semaphorin 3G, secreted            | NM_001025379    | Sema3g             | -2.514                          |
| Semaphorin 4A, transmembrane       | NM_013658       | Sema4a             | -4.1699                         |
| Semaphorin 4B, transmembrane       | NM_013659       | Sema4b             | -1.9185                         |
| Semaphorin 4C, transmembrane       | XM_898566       | Sema4c             | -1.5476                         |
| Semaphorin 4D, transmembrane       | NM_013660       | Sema4d             | 1.2142                          |
| Semaphorin 4G, transmembrane       | NM_011976       | Sema4g             | 31.779                          |
| Semaphorin 5A, transmembrane       | NM_009154       | Sema5a             | -85.6274                        |
| Semaphorin 5B, transmembrane       | NM_013661       | Sema5b             | -1.2746                         |
| Semaphorin 6A, transmembrane       | NM_018744       | Sema6a             | -2.1287                         |
| Semaphorin 6B, transmembrane       | NM_013662       | Sema6b             | -2.3784                         |
| Semaphorin 6C, transmembrane       | NM_011351       | Sema6c             | -2.2658                         |
| Semaphorin 6D, transmembrane       | NM_172537       | Sema6d             | -1.1019                         |
| Semaphorin 7A, GPI anchor          | NM_011352       | Sema7a             | -1.4439                         |
| Plexin A1                          | NM_008881       | Plxna1             | -2.5315                         |
| Plexin A2                          | NM_008882       | Plxna2             | -1.1251                         |
| Plexin A3                          | NM_008883       | Plxna3             | 1.0792                          |
| Plexin A4                          | NM_175750       | Plxna4             | 1.1892                          |
| Plexin B1                          | NM_172775       | Plxnb1             | -1.5801                         |
| Plexin B2                          | XM_001003435    | Plxnb2             | 2.639                           |
| Plexin B3                          | NM_019587       | Plxnb3             | -1.3472                         |
| Plexin C1                          | NM_018797       | Plxnc1             | 6.498                           |
| Plexin D1                          | NM_026376       | Plxnd1             | 1.7291                          |
| Neuropilin 1                       | NM_008737       | Nrp1               | 2.2038                          |
| Neuropilin 2                       | NM_010939       | Nrp2               | 2.0279                          |
| Mouse 18S rRNA gene, clones 5a,6,7 | K01364          | 18SrRNA            | 1.2354                          |

**Supplementary Table 2. RT-PCR primer sequences**

|                       | <b>Forward (5'-3')</b>      |
|-----------------------|-----------------------------|
| Mouse <i>Ntn1</i>     | CAGCCTGATCCTTGCTCGG         |
| Mouse <i>Unc5b</i>    | TGGATCTTTCAGCTCAAGACCCAG    |
| Mouse <i>Adora2b</i>  | GCGAGAGGGATCATTGCTGTC       |
| Mouse <i>Dcc</i>      | CAAGCTGGCTTTTGTACTCTTCG     |
| Mouse <i>Neogenin</i> | CTAGCATTGTAGTGAGCTGGAC      |
| Mouse <i>Emr1</i>     | CCCCAGTGTCCTTACAGAGTG       |
| Mouse <i>Cd206</i>    | CTCTGTTTCAGCTATTGGACGC      |
| Mouse <i>Il10</i>     | GCTCTTACTGACTGGCATGAG       |
| Mouse <i>Pparg</i>    | TCGCTGATGCACTGCCTATG        |
| Mouse <i>Nos2</i>     | GTTCTCAGCCCAACAATACAAGA     |
| Mouse <i>Ccl2</i>     | TTAAAAACCTGGATCGGAACCAA     |
| Mouse <i>Tnfa</i>     | ATGAGCACAGAAAGCATGATCCGC    |
| Mouse <i>Il6</i>      | CCAAGAGGTGAGTGCTTCCC        |
| Mouse <i>Il4</i>      | GGTCTCAACCCCCAGCTAGT        |
| Mouse <i>28s</i>      | TGGGGAATGCAGCCCAAG          |
| Mouse <i>Gapdh</i>    | TGTGAGGGAGATGCTCAGTG        |
| Human <i>NTN1</i>     | CTCACACTGTCCCTCGGCAAGAAGT   |
| Human <i>UNC5H</i>    | CAGCCTTAAGGTCAAGGTCTACAGCTC |
| Human <i>TNFA</i>     | GAGGGCTGATTAGAGAGAGGTC      |
| Human <i>SEMA3A</i>   | GTGCCAAGGCTGAAATTATCCT      |
| Human <i>EFNB2</i>    | ACTGCTGGGGTGTTTTGATGG       |
| Human <i>CD68</i>     | GCTACATGGCGGTGGAGTACAA      |
| Human <i>Il10</i>     | GACTTTAAGGGTTACCTGGGTTG     |
| Human <i>DCC</i>      | GGTTCTTCTGCCAGTGGATTGTTGG   |
| Human <i>SEMA3E</i>   | GGTTACGCCTGTCACATAAAGA      |
